# Supplementary material for: Polydopamine-Modified Copper Coordination Mesoporous Silica Nanoparticles Loaded with Disulfiram for Synergistic Chemo-Photothermal Therapy
Source: MDPI journal article supplement (doi:10.3390/pharmaceutics16040512), 2024-04-07
Supplement: s1 [file s1]

Supplementary Information

# Polydopamine Modified Copper Coordination Mesoporous Silica Nanoparticles Loaded with Disulfiram for Synergistic Chemo-Photothermal Therapy

Junhong Ling, Yingying Cai, Haozhan Feng, Zhen Liu, Xiao-kun Ouyang \*

School of Food and Pharmacy, Zhejiang Ocean University, Zhoushan 316022, China;

\* Correspondence: xkouyang@zjou.edu.cn; Tel.: +86-580-2554781

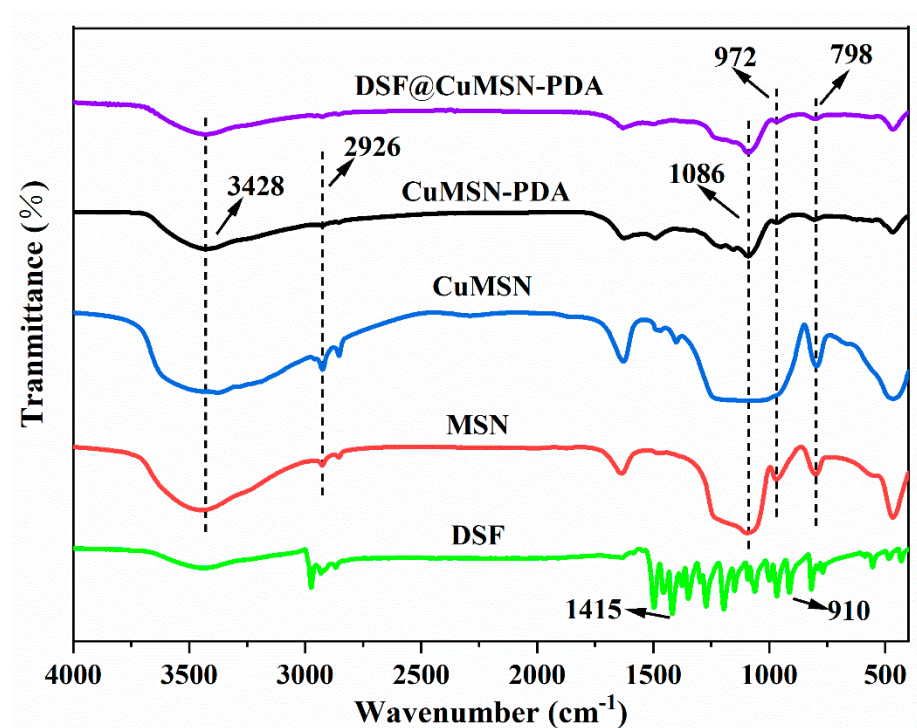

**Figure S1.** Infrared spectra of DSF, MSN, CuMSN, CuMSN-PDA, DSF@CuMSN-PDA.

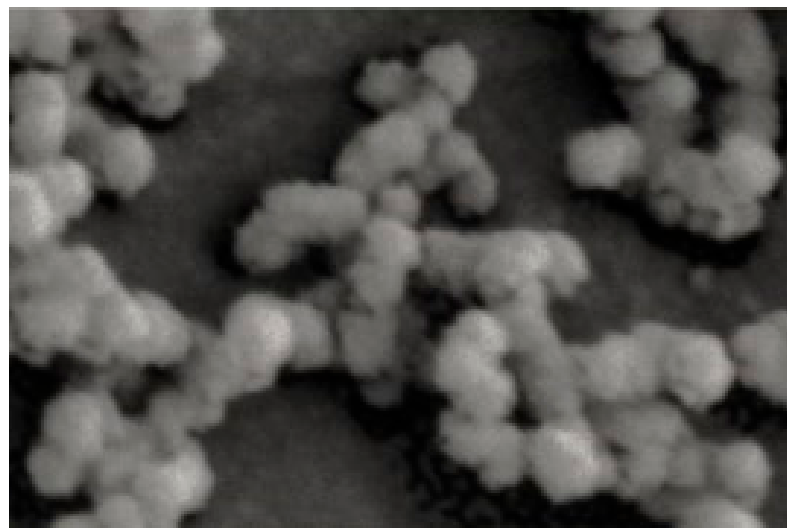

**Figure S2.** SEM image of CuMSN.

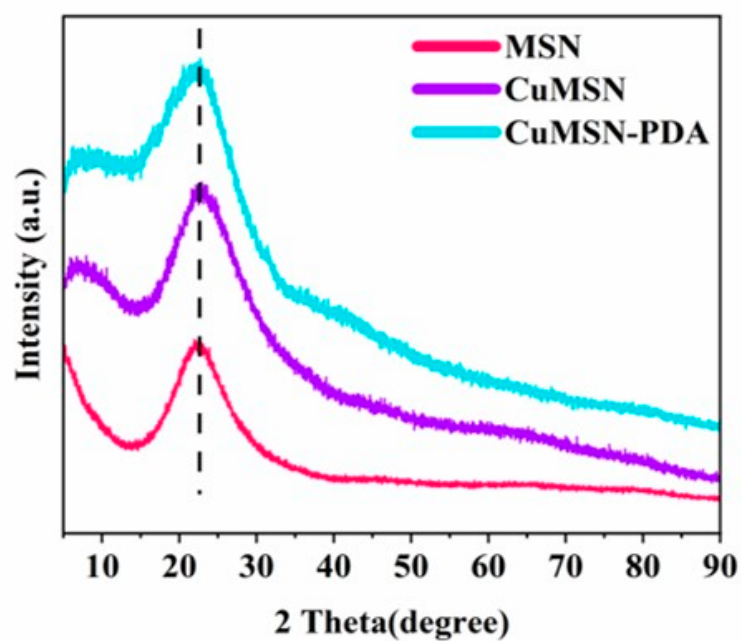

Figure S3. XRD patterns of MSN, CuMSN, and CuMSN-PDA.

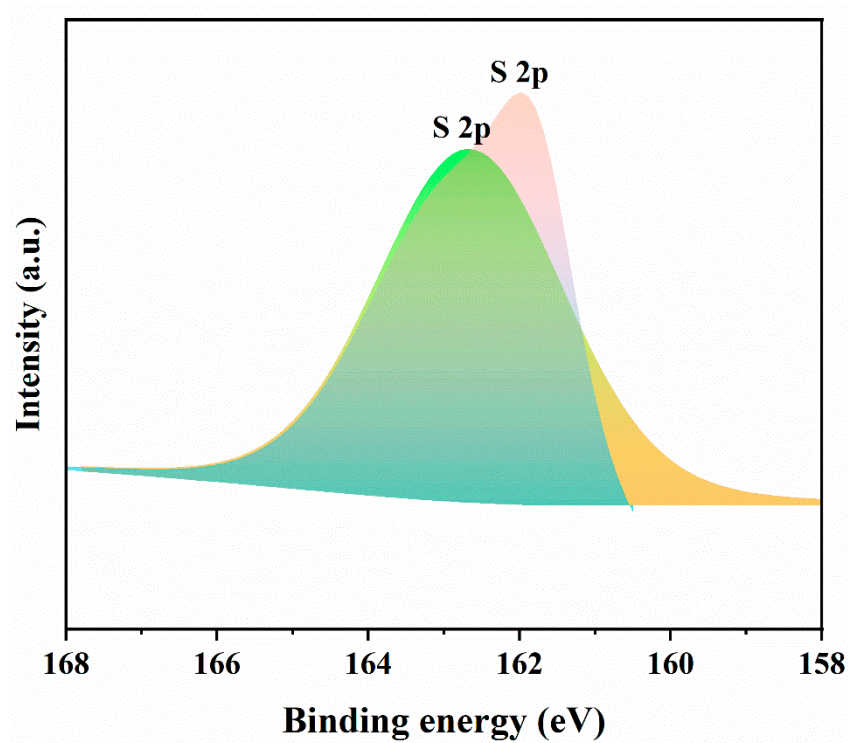

Figure S4. Peak fitting pattern of S.

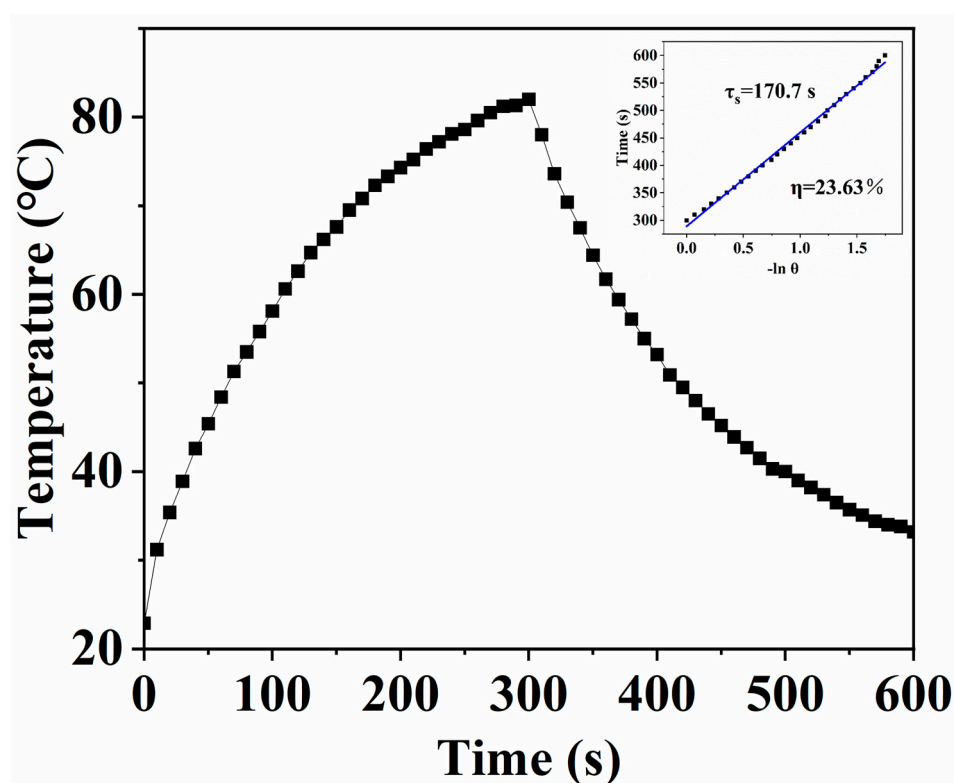

**Figure S5.** The photothermal conversion efficiency ( $\eta$ ) of DSF@CuMSN-PDA (100  $\mu\text{g/mL}$ ) under 2.0  $\text{W/cm}^2$  laser irradiation with 808 nm.

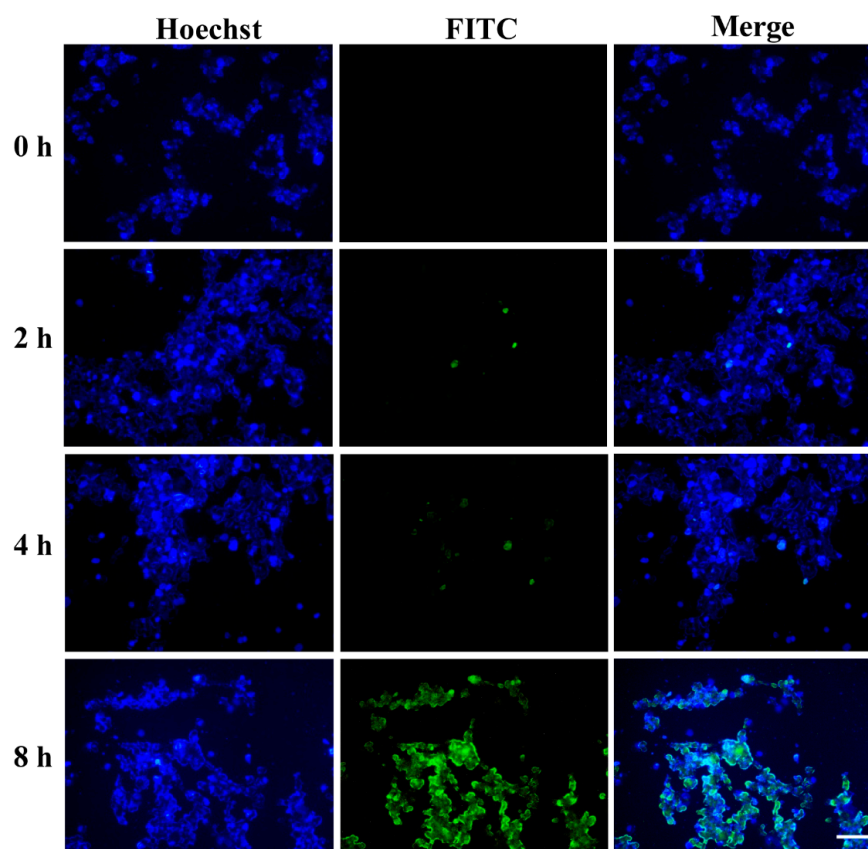

**Figure S6.** Fluorescence images of cellular uptake of FITC@CuMSN-PDA after 0 h, 2 h, 4 h, and 8 h incubation (scale bar: 100  $\mu\text{m}$ ).



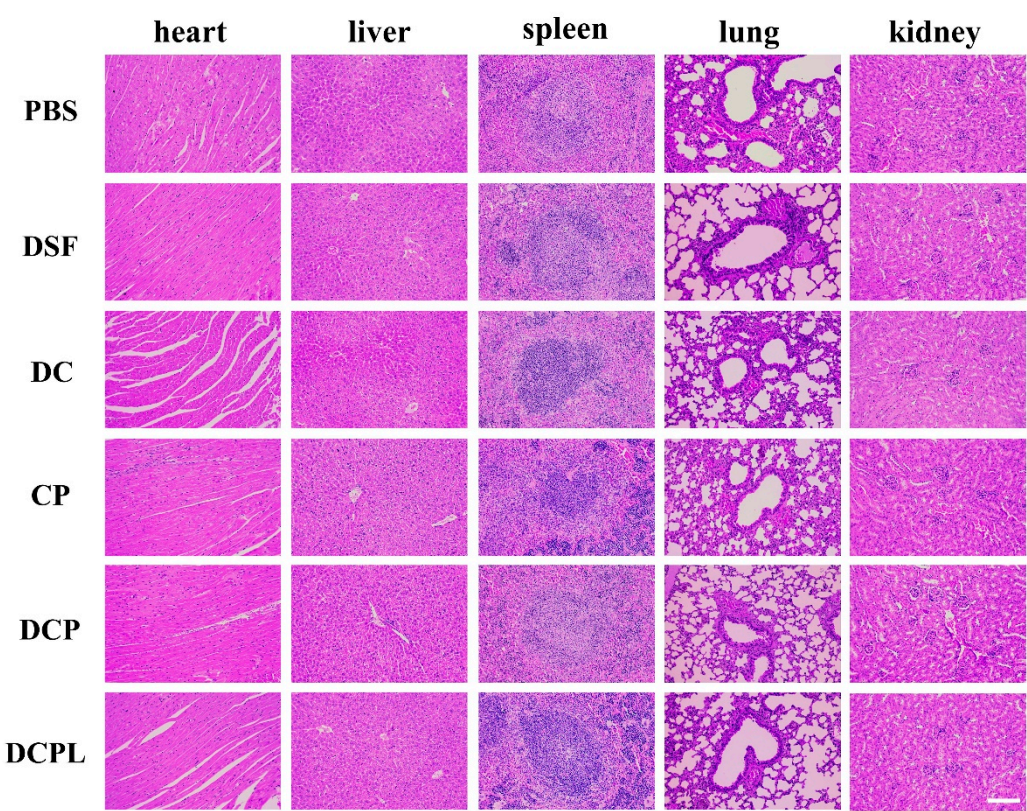

**Figure S7.** H&E staining of major organs after different treatments.
